# Supplementary material for: Prevalence, Morbidity, and Mortality of Men With Sex Chromosome Aneuploidy in the Million Veteran Program Cohort
Source: PubMed Central journal article supplement (PMC10980972; doi:10.1001/jamanetworkopen.2024.4113), 2024-03-29
Supplement: jamanetwopen-e244113-s001.pdf [file jamanetwopen-e244113-s001.pdf]

## Supplemental Online Content

Davis SM, Teerlink C, Lynch JA, et al. Prevalence, morbidity, and mortality of men with sex chromosome aneuploidy in the Million Veteran Program cohort. *JAMA Netw Open*. 2024;7(3):e244113. doi:10.1001/jamanetworkopen.2024.4113

**eFigure 1.** Scatterplot of Sex Chromosome Array Intensity

**eFigure 2.** Self-Reported Medical History in Males with 47,XXY Stratified by Clinical Ascertainment Status

**eTable 1.** Standardized Mortality Ratio by Cause of Death for Males with 47,XXY, 47,XYY, and Either Sex Chromosome Aneuploidy Compared With Matched 46,XY Controls

**eTable 2.** Military Service, Morbidity, and Participant Reported Outcome Measures in Males With 47,XXY Stratified by Clinical Diagnosis Status

**eTable 3.** Self-Reported Medical History in Males With Either Sex Chromosome Aneuploidy Compared to Matched 46,XY Controls

**eTable 4.** Self-Reported Medical History in Males With 47,XXY Compared With Matched 46,XY Controls

**eTable 5.** Self-Reported Medical History in Males With 47,XYY Compared With Matched 46,XY Controls

This supplemental material has been provided by the authors to give readers additional information about their work.

**Supplemental Figure 1.** Scatterplot of sex chromosome array intensity over >20,000 X probes and 157 Y probes in all male MVP participants to identify men with an additional X or Y chromosome. Orange dots are males with 47,XXY, blue dots are males with 47,XYY, and black are males with 46,XY

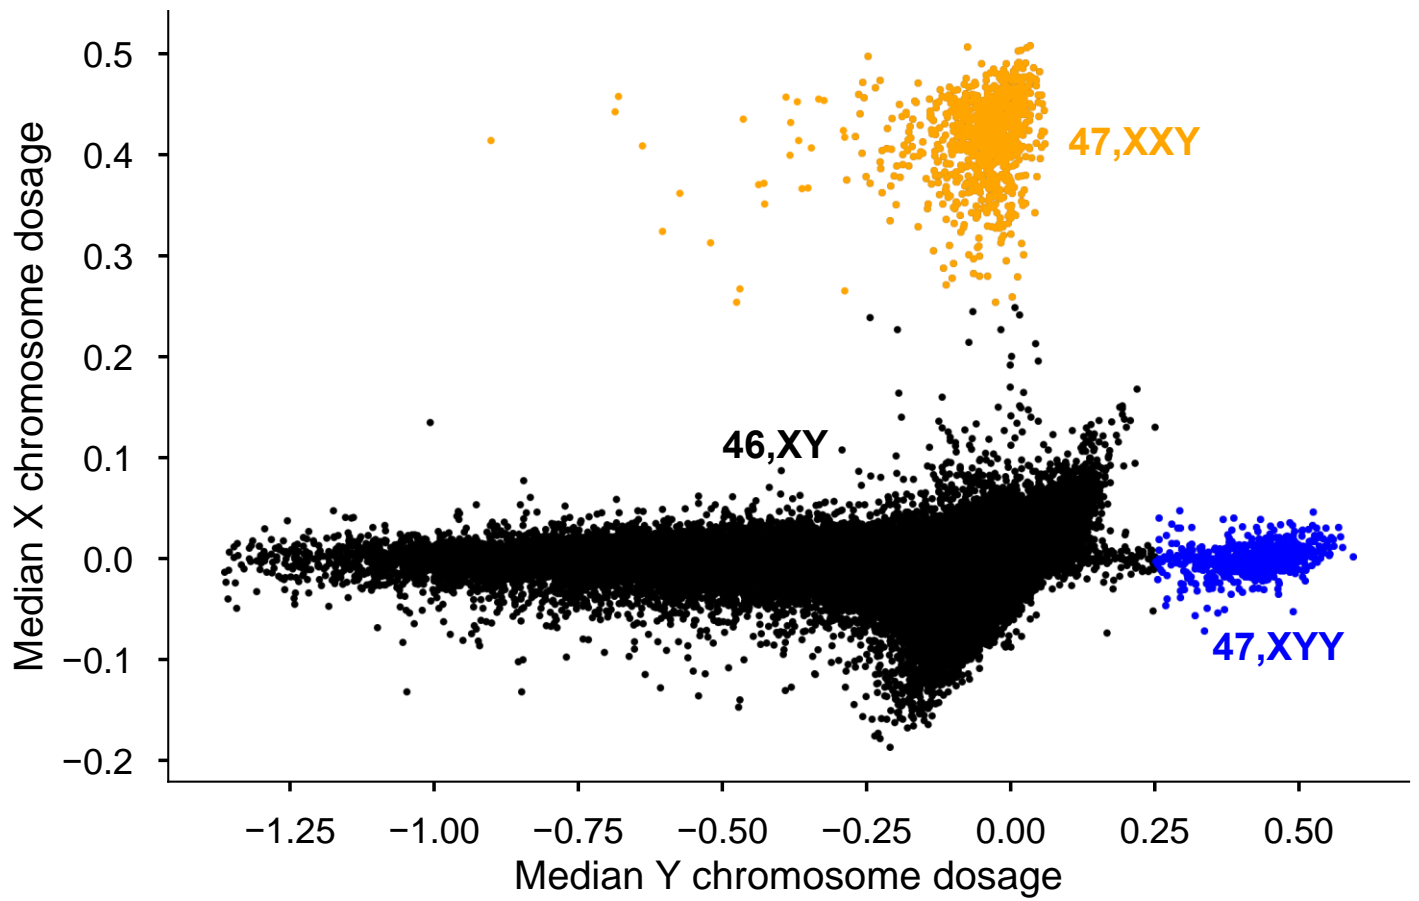

**Supplemental Figure 2. Self-Reported Medical History in Males with 47,XXY Stratified by Clinical Ascertainment Status**

Forest plot with odds ratios (point estimate) and 95% confidence intervals (error bars) for self-reported conditions in men with 47,XXY versus 46,XY controls from the Baseline Survey. Only conditions that were significantly different ( $p < 0.05$ ) between men with 47,XXY and matched 46,XY controls (orange squares) are included. Individuals were then stratified into a clinical diagnosis of Klinefelter syndrome (gray circles) or no clinical diagnosis (white circles). Statistically significant differences in odds of reporting a specific medical condition between the diagnosed versus undiagnosed groups are indicated in the dashed rectangular boxes; gray indicates higher odds in those with a clinical diagnosis, red indicates higher odds in those without a clinical diagnosis.

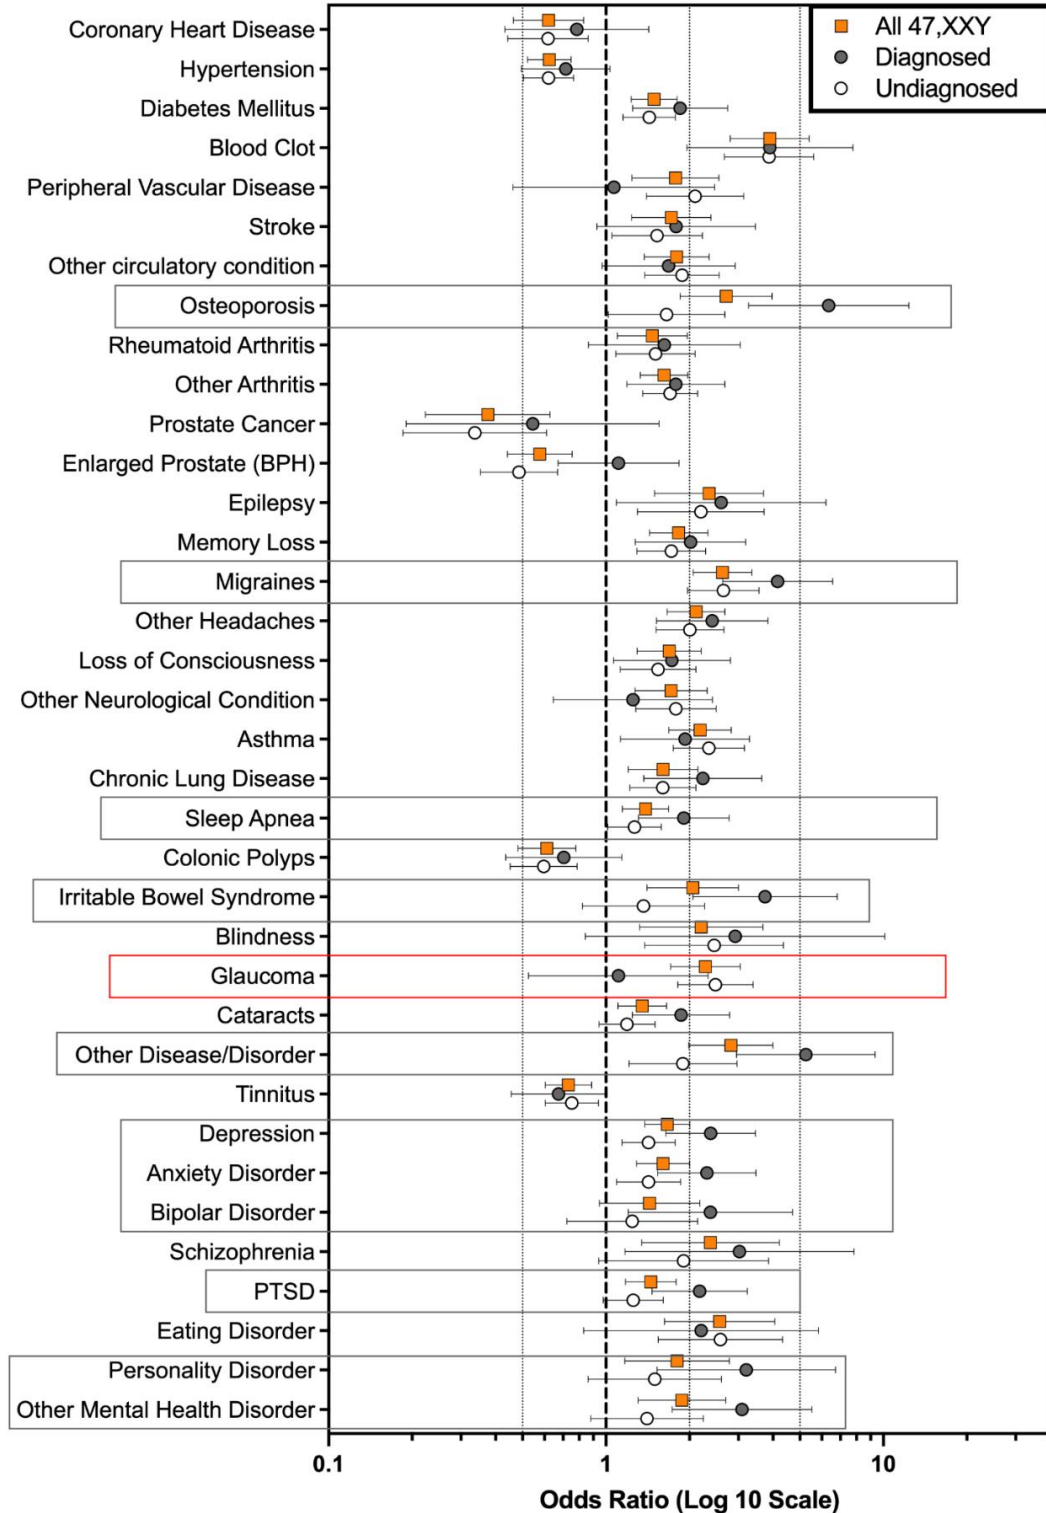



|                                                | Clinically Diagnosed Cohort                     |                                                         |                                 | Undiagnosed Cohort                                     |                                                           |                                 | 47,XXY diagnosed vs undiagnosed p-value |
|------------------------------------------------|-------------------------------------------------|---------------------------------------------------------|---------------------------------|--------------------------------------------------------|-----------------------------------------------------------|---------------------------------|-----------------------------------------|
|                                                | Cases<br>Total N=226<br>BL survey<br>n=137 Life | Total N=1130<br>BL survey<br>n=687 Life<br>survey n=475 | cases vs<br>controls<br>p-value | Cases<br>Total N=640<br>BL survey n=437<br>Life survey | Total N=3200<br>BL survey<br>n=2092 Life<br>survey n=1560 | cases vs<br>controls<br>p-value |                                         |
| <b>Demographics and Military Service</b>       |                                                 |                                                         |                                 |                                                        |                                                           |                                 |                                         |
| Age at enrollment (yrs)                        | 56.9 ± 13.4                                     | 56.9 ± 13.4                                             | 1                               | 62.7 ± 11.2                                            | 62.7 ± 11.2                                               | 1                               | <0.001                                  |
| European Genetic Ancestry                      | 190 (84.1%)                                     | 950 (84.1%)                                             | 1                               | 539 (84.2%)                                            | 2695 (84.2%)                                              | 1                               | 0.958                                   |
| Service Era: Vietnam                           | 91 (40.2%)                                      | 456 (40.4%)                                             | 0.980                           | 373 (58.3%)                                            | 1847 (57.7%)                                              | 0.793                           | <0.001                                  |
| Military Branch: Army <sup>^</sup>             | 64 (50.0%)                                      | 312 (50.4%)                                             | 0.722                           | 180 (53.9%)                                            | 869 (51.7%)                                               | 0.036                           | 0.959                                   |
| Combat Service: Yes <sup>^</sup>               | 45 (21.3%)                                      | 137 (14.5%)                                             | <0.001                          | 80 (12.5%)                                             | 410 (12.8%)                                               | 0.124                           | 0.005                                   |
| Deployed outside the US                        | 96 (70.1%)                                      | 493 (71.8%)                                             | 0.680                           | 329 (74.8%)                                            | 1585 (75.8%)                                              | 0.669                           | 0.317                                   |
| Exposure to biochemical warfare                | 24 (17.5%)                                      | 58 (8.4%)                                               | 0.009                           | 50 (11.4%)                                             | 200 (9.6%)                                                | 0.420                           | 0.200                                   |
| Honorable Discharge <sup>^</sup>               | 120 (95.2%)                                     | 578 (93.8%)                                             | 0.776                           | 303 (91.0%)                                            | 1566 (93.7%)                                              | 0.202                           | 0.184                                   |
| <b>Healthcare Utilization</b>                  |                                                 |                                                         |                                 |                                                        |                                                           |                                 |                                         |
| Care within VA system: 100%                    | 68 (49.6%)                                      | 289 (42.1%)                                             | 0.004                           | 189 (43.0%)                                            | 912 (43.6%)                                               | 0.485                           | 0.009                                   |
| Outpatient encounters/yr                       | 26.6 (14.9-43.2)                                | 16.7 (9.3-28.0)                                         | <0.001                          | 22.2 (11.3-36.0)                                       | 17.2 (9.6-28.3)                                           | <0.001                          | 0.001                                   |
| Emergency encounters/yr                        | 0.46 (0.21-1.0)                                 | 0.37 (0.15-0.77)                                        | 0.005                           | 0.26 (0.05-0.76)                                       | 0.33 (0.14-0.67)                                          | <0.001                          | <0.001                                  |
| Inpatient encounters/yr                        | 0.11 (0.0-0.33)                                 | 0.05 (0.0-0.24)                                         | <0.001                          | 0.13 (0.0-0.33)                                        | 0.06 (0.0-0.24)                                           | <0.001                          | 0.455                                   |
| Hospitalized in past year (VA)                 | 40 (29.2%)                                      | 113 (16.5%)                                             | <0.001                          | 122 (27.9%)                                            | 359 (17.2%)                                               | <0.001                          | 0.642                                   |
| <b>Medical Characteristics &amp; Morbidity</b> |                                                 |                                                         |                                 |                                                        |                                                           |                                 |                                         |
| Height (cm) at enrollment                      | 182.7 ± 8.4                                     | 178.4 ± 7.0                                             | <0.001                          | 182.5 ± 7.7                                            | 178.0 ± 7.2                                               | <0.001                          | 0.822                                   |
| Weight (kg) at enrollment                      | 103.3 ± 21.9                                    | 96.1 ± 20.1                                             | <0.001                          | 103.1 ± 23.4                                           | 94.9 ± 20.1                                               | <0.001                          | 0.902                                   |
| BMI (kg/m <sup>2</sup> ) at enrollment         | 31.4 ± 6.2                                      | 30.8 ± 6.2                                              | 0.153                           | 31.4 ± 6.8                                             | 30.4 ± 6.1                                                | <0.001                          | 0.954                                   |
| Charlson Comorbidity Index                     | 3.65 ± 2.73                                     | 3.39 ± 2.55                                             | 0.198                           | 4.53 ± 2.68                                            | 4.13 ± 2.47                                               | <0.001                          | <0.001                                  |
| >10 Prescription Medications                   | 35 (25.5%)                                      | 95 (13.8%)                                              | <0.001                          | 97 (22.0%)                                             | 311 (14.9%)                                               | <0.001                          | 0.052                                   |
| Sexual Health Problems                         | 18 (20.5%)                                      | 40 (8.4%)                                               | 0.002                           | 39 (11.6%)                                             | 152 (9.7%)                                                | 0.272                           | 0.036                                   |
| Fertility Problems                             | 52 (59.1%)                                      | 31 (6.5%)                                               | <0.001                          | 164 (48.8%)                                            | 110 (7.1%)                                                | <0.001                          | 0.094                                   |
| <b>Psychosocial Morbidity</b>                  |                                                 |                                                         |                                 |                                                        |                                                           |                                 |                                         |
| VR-12 Physical Functioning                     | 34.8 ± 12.4                                     | 38.4 ± 13.3                                             | 0.005                           | 34.0 ± 11.9                                            | 37.6 ± 12.8                                               | <0.001                          | 0.519                                   |
| VR-12 Mental Health                            | 42.8 ± 15.0                                     | 46.5 ± 14.0                                             | 0.009                           | 46.0 ± 13.6                                            | 48.2 ± 13.2                                               | 0.003                           | 0.023                                   |
| MOS Cog-R                                      | 12.6 ± 6.0                                      | 12.2 ± 7.6                                              | 0.608                           | 12.6 ± 7.7                                             | 11.5 ± 7.1                                                | 0.020                           | 0.985                                   |
| PHQ4 Total                                     | 3.14 ± 3.4                                      | 2.45 ± 3.29                                             | 0.084                           | 2.87 ± 3.5                                             | 2.23 ± 3.2                                                | 0.002                           | 0.487                                   |
| PHQ4 Anxiety Subscale                          | 1.54 ± 1.87                                     | 1.19 ± 1.7                                              | 0.106                           | 1.42 ± 1.86                                            | 1.12 ± 1.7                                                | 0.005                           | 0.598                                   |
| PHQ4 Depression Subscale                       | 1.6 ± 1.78                                      | 1.29 ± 1.78                                             | 0.128                           | 1.51 ± 1.91                                            | 1.14 ± 1.68                                               | <0.001                          | 0.657                                   |
| PCL Total                                      | 36.5 ± 17.0                                     | 32.6 ± 16.3                                             | 0.055                           | 35.6 ± 17.1                                            | 31.5 ± 15.7                                               | <0.001                          | 0.649                                   |
| <b>Mortality</b>                               |                                                 |                                                         |                                 |                                                        |                                                           |                                 |                                         |
| Deceased                                       | 20 (8.8%)                                       | 127 (11.2%)                                             | 0.292                           | 90 (14.1%)                                             | 410 (12.8%)                                               | 0.493                           | 0.092                                   |

**Table S2. Military Service, Morbidity, and Participant Reported Outcome Measures in Males with 47,XXY Stratified by Clinical Diagnosis Status.** Colored text indicate the data source and subsequently the sample size available for that variable: black is the electronic health record database, blue is the Baseline Survey, and green is the Lifestyle Survey. Data are shown as mean ± standard deviation (SD) and/or median (range) for continuous data, and n (%) for categorical data, unless otherwise specified. Bolded p-values indicate statistical significance at an alpha of 0.05. <sup>^</sup>Percentages are calculated from the total with non-missing data; chi-squared analyses included missing as a category. VA = Veterans Affairs; VR-12 = Veterans RAND 12 Item Health Survey (higher values indicate better QoL). MOS Cog-R = Medical Outcomes Survey Cognitive Functioning Revised Scale (higher values indicate more problems). PHQ-4 = Patient Health Questionnaire-4 (higher values indicate more concern). PCL = Post-traumatic stress disorder Checklist (higher values indicate more concern).

**Table S3a. Self-Reported Medical History in Males with Either Sex Chromosome Aneuploidy Compared to Matched 46,XY Controls**

|                                         | Any SCA    |             | Controls    |             | OR          | U95%CI      | L95%CI      |
|-----------------------------------------|------------|-------------|-------------|-------------|-------------|-------------|-------------|
|                                         | with       | w/o         | with        | w/o         |             |             |             |
| Circ-Congestive Heart Failure           | 69         | 1005        | 303         | 4840        | 1.10        | 1.44        | 0.84        |
| <b>Circ-Coronary Artery Disease</b>     | <b>114</b> | <b>960</b>  | <b>779</b>  | <b>4364</b> | <b>0.67</b> | <b>0.82</b> | <b>0.54</b> |
| Circ-High Cholesterol                   | 555        | 519         | 2604        | 2539        | 1.04        | 1.19        | 0.91        |
| <b>Circ-Hypertension</b>                | <b>584</b> | <b>490</b>  | <b>3164</b> | <b>1979</b> | <b>0.75</b> | <b>0.85</b> | <b>0.65</b> |
| Circ-Myocardial Infarction              | 111        | 963         | 612         | 4531        | 0.85        | 1.06        | 0.69        |
| <b>Circ-Other Circ System Problem</b>   | <b>165</b> | <b>909</b>  | <b>427</b>  | <b>4716</b> | <b>2.00</b> | <b>2.43</b> | <b>1.65</b> |
| <b>Circ-PE or DVT</b>                   | <b>123</b> | <b>951</b>  | <b>177</b>  | <b>4966</b> | <b>3.63</b> | <b>4.61</b> | <b>2.85</b> |
| <b>Circ-Peripheral Vascular Disease</b> | <b>81</b>  | <b>993</b>  | <b>228</b>  | <b>4915</b> | <b>1.76</b> | <b>2.29</b> | <b>1.35</b> |
| <b>Circ-Stroke</b>                      | <b>95</b>  | <b>979</b>  | <b>282</b>  | <b>4861</b> | <b>1.67</b> | <b>2.13</b> | <b>1.31</b> |
| <b>Circ-Transient Ischemic Attack</b>   | <b>55</b>  | <b>1019</b> | <b>191</b>  | <b>4952</b> | <b>1.40</b> | <b>1.90</b> | <b>1.03</b> |
| <b>Endo-Diabetes</b>                    | <b>401</b> | <b>673</b>  | <b>1403</b> | <b>3740</b> | <b>1.59</b> | <b>1.82</b> | <b>1.38</b> |
| Endo-Thyroid problem                    | 88         | 986         | 434         | 4709        | 0.97        | 1.23        | 0.76        |
| <b>GI-Acid Reflux/GERD</b>              | <b>401</b> | <b>673</b>  | <b>1764</b> | <b>3553</b> | <b>1.20</b> | <b>1.38</b> | <b>1.05</b> |
| <b>GI-Bowel obstruction</b>             | <b>29</b>  | <b>1045</b> | <b>76</b>   | <b>5067</b> | <b>1.85</b> | <b>2.85</b> | <b>1.20</b> |
| GI-Celiac disease                       | 3          | 1071        | 10          | 5133        | 1.44        | 5.23        | 0.40        |
| <b>GI-Colon Polyps</b>                  | <b>178</b> | <b>896</b>  | <b>1212</b> | <b>3931</b> | <b>0.64</b> | <b>0.77</b> | <b>0.54</b> |
| GI-Crohn's Disease                      | 7          | 1067        | 26          | 5117        | 1.29        | 2.98        | 0.56        |
| <b>GI-Irritable Bowel Syndrome</b>      | <b>45</b>  | <b>1029</b> | <b>139</b>  | <b>5004</b> | <b>1.57</b> | <b>2.22</b> | <b>1.12</b> |
| GI-Liver condition (eg cirrhosis)       | 41         | 1033        | 190         | 4953        | 1.03        | 1.46        | 0.73        |
| GI-Other                                | 67         | 1007        | 263         | 4880        | 1.23        | 1.63        | 0.94        |
| GI-Peptic Ulcers                        | 50         | 1024        | 188         | 4955        | 1.29        | 1.77        | 0.94        |
| GI-Ulcerative colitis                   | 13         | 1061        | 61          | 5082        | 1.02        | 1.86        | 0.56        |
| <b>HEENT-Blindness-any cause</b>        | <b>38</b>  | <b>1036</b> | <b>91</b>   | <b>5052</b> | <b>2.04</b> | <b>2.99</b> | <b>1.39</b> |
| <b>HEENT-Cataracts</b>                  | <b>292</b> | <b>782</b>  | <b>1177</b> | <b>3966</b> | <b>1.26</b> | <b>1.46</b> | <b>1.08</b> |
| HEENT-Deafness (partial/severe)         | 340        | 734         | 1556        | 3587        | 1.07        | 1.23        | 0.93        |
| <b>HEENT-Glaucoma</b>                   | <b>154</b> | <b>920</b>  | <b>312</b>  | <b>4831</b> | <b>2.59</b> | <b>3.18</b> | <b>2.11</b> |
| HEENT-Macular Degeneration              | 50         | 1024        | 233         | 4910        | 1.03        | 1.41        | 0.75        |
| <b>HEENT-Tinnitus</b>                   | <b>343</b> | <b>731</b>  | <b>1965</b> | <b>3178</b> | <b>0.76</b> | <b>0.87</b> | <b>0.66</b> |
| Infx-Hepatitis C                        | 52         | 1022        | 284         | 4859        | 0.87        | 1.18        | 0.64        |
| Infx-HIV/AIDS                           | 12         | 1062        | 54          | 5089        | 1.06        | 2.00        | 0.57        |
| Infx-Other                              | 37         | 1037        | 124         | 5019        | 1.44        | 2.10        | 0.99        |
| Infx-Tuberculosis                       | 22         | 1052        | 90          | 5053        | 1.17        | 1.88        | 0.73        |
| <b>MH-ADHD</b>                          | <b>55</b>  | <b>1019</b> | <b>182</b>  | <b>4961</b> | <b>1.47</b> | <b>2.00</b> | <b>1.08</b> |
| <b>MH-Anxiety/Panic</b>                 | <b>217</b> | <b>857</b>  | <b>835</b>  | <b>4308</b> | <b>1.31</b> | <b>1.54</b> | <b>1.11</b> |
| <b>MH-Bipolar</b>                       | <b>56</b>  | <b>1018</b> | <b>195</b>  | <b>4948</b> | <b>1.40</b> | <b>1.89</b> | <b>1.03</b> |
| <b>MH-Depression</b>                    | <b>374</b> | <b>700</b>  | <b>1458</b> | <b>3685</b> | <b>1.35</b> | <b>1.55</b> | <b>1.17</b> |
| <b>MH-Eating disorder</b>               | <b>55</b>  | <b>1019</b> | <b>110</b>  | <b>5033</b> | <b>2.47</b> | <b>3.44</b> | <b>1.77</b> |

|                                                                                                                                                                                                                                                                                              |            |             |             |             |             |              |             |
|----------------------------------------------------------------------------------------------------------------------------------------------------------------------------------------------------------------------------------------------------------------------------------------------|------------|-------------|-------------|-------------|-------------|--------------|-------------|
| <b>MH-Other</b>                                                                                                                                                                                                                                                                              | <b>80</b>  | <b>994</b>  | <b>214</b>  | <b>4929</b> | <b>1.85</b> | <b>2.42</b>  | <b>1.42</b> |
| <b>MH-Personality disorder</b>                                                                                                                                                                                                                                                               | <b>56</b>  | <b>1018</b> | <b>147</b>  | <b>4996</b> | <b>1.87</b> | <b>2.56</b>  | <b>1.36</b> |
| MH-PTSD                                                                                                                                                                                                                                                                                      | 194        | 880         | 812         | 4331        | 1.18        | 1.40         | 0.99        |
| <b>MH-Schizophrenia</b>                                                                                                                                                                                                                                                                      | <b>34</b>  | <b>1040</b> | <b>75</b>   | <b>5068</b> | <b>2.21</b> | <b>3.33</b>  | <b>1.47</b> |
| MH-Social Phobia                                                                                                                                                                                                                                                                             | 33         | 1041        | 175         | 4968        | 0.90        | 1.31         | 0.62        |
| <b>MSK-Gout</b>                                                                                                                                                                                                                                                                              | <b>82</b>  | <b>992</b>  | <b>644</b>  | <b>4599</b> | <b>0.59</b> | <b>0.75</b>  | <b>0.46</b> |
| <b>MSK-Osteoarthritis</b>                                                                                                                                                                                                                                                                    | <b>240</b> | <b>834</b>  | <b>968</b>  | <b>4175</b> | <b>1.24</b> | <b>1.46</b>  | <b>1.06</b> |
| <b>MSK-Osteoporosis</b>                                                                                                                                                                                                                                                                      | <b>57</b>  | <b>1017</b> | <b>154</b>  | <b>4989</b> | <b>1.82</b> | <b>2.48</b>  | <b>1.33</b> |
| <b>MSK-Other arthritis</b>                                                                                                                                                                                                                                                                   | <b>306</b> | <b>768</b>  | <b>1153</b> | <b>3990</b> | <b>1.38</b> | <b>1.60</b>  | <b>1.19</b> |
| MSK-Other MSK problem                                                                                                                                                                                                                                                                        | 217        | 857         | 1114        | 4029        | 0.92        | 1.08         | 0.78        |
| <b>MSK-Rheumatoid arthritis</b>                                                                                                                                                                                                                                                              | <b>107</b> | <b>967</b>  | <b>414</b>  | <b>4729</b> | <b>1.26</b> | <b>1.58</b>  | <b>1.01</b> |
| Neuro-ALS                                                                                                                                                                                                                                                                                    | 2          | 1072        | 3           | 5140        | 3.20        | 19.15        | 0.53        |
| Neuro-Dementia                                                                                                                                                                                                                                                                               | 16         | 1058        | 50          | 5093        | 1.54        | 2.72         | 0.87        |
| <b>Neuro-Epilepsy</b>                                                                                                                                                                                                                                                                        | <b>47</b>  | <b>1027</b> | <b>115</b>  | <b>5028</b> | <b>2.00</b> | <b>2.83</b>  | <b>1.42</b> |
| <b>Neuro-Loss of consciousness</b>                                                                                                                                                                                                                                                           | <b>149</b> | <b>925</b>  | <b>485</b>  | <b>4658</b> | <b>1.55</b> | <b>1.88</b>  | <b>1.27</b> |
| <b>Neuro-Memory loss/impairment</b>                                                                                                                                                                                                                                                          | <b>168</b> | <b>906</b>  | <b>571</b>  | <b>4572</b> | <b>1.48</b> | <b>1.79</b>  | <b>1.23</b> |
| <b>Neuro-Migraines</b>                                                                                                                                                                                                                                                                       | <b>183</b> | <b>891</b>  | <b>461</b>  | <b>4682</b> | <b>2.09</b> | <b>2.51</b>  | <b>1.73</b> |
| Neuro-MS                                                                                                                                                                                                                                                                                     | 4          | 1070        | 27          | 5116        | 0.71        | 2.03         | 0.25        |
| <b>Neuro-Other</b>                                                                                                                                                                                                                                                                           | <b>118</b> | <b>956</b>  | <b>352</b>  | <b>4791</b> | <b>1.68</b> | <b>2.09</b>  | <b>1.35</b> |
| <b>Neuro-Other Headaches</b>                                                                                                                                                                                                                                                                 | <b>199</b> | <b>875</b>  | <b>540</b>  | <b>4603</b> | <b>1.94</b> | <b>2.32</b>  | <b>1.62</b> |
| <b>Neuro-Parkinson's disease</b>                                                                                                                                                                                                                                                             | <b>21</b>  | <b>1053</b> | <b>60</b>   | <b>5083</b> | <b>1.69</b> | <b>2.79</b>  | <b>1.02</b> |
| Neuro-Spinal Cord Injury                                                                                                                                                                                                                                                                     | 95         | 979         | 389         | 4754        | 1.19        | 1.50         | 0.94        |
| Neuro-Traumatic Brain Injury                                                                                                                                                                                                                                                                 | 48         | 1026        | 199         | 4944        | 1.16        | 1.60         | 0.84        |
| <b>Onc-Breast cancer</b>                                                                                                                                                                                                                                                                     | <b>6</b>   | <b>1068</b> | <b>5</b>    | <b>5138</b> | <b>5.77</b> | <b>18.95</b> | <b>1.76</b> |
| Onc-Colorectal cancer                                                                                                                                                                                                                                                                        | 16         | 1058        | 86          | 5057        | 0.89        | 1.52         | 0.52        |
| Onc-Lung cancer                                                                                                                                                                                                                                                                              | 16         | 1058        | 61          | 5082        | 1.26        | 2.19         | 0.72        |
| Onc-other cancer                                                                                                                                                                                                                                                                             | 74         | 1000        | 366         | 4777        | 0.97        | 1.25         | 0.75        |
| <b>Onc-Prostate cancer</b>                                                                                                                                                                                                                                                                   | <b>42</b>  | <b>1032</b> | <b>347</b>  | <b>4796</b> | <b>0.56</b> | <b>0.78</b>  | <b>0.41</b> |
| Onc-Skin cancer                                                                                                                                                                                                                                                                              | 137        | 937         | 742         | 4401        | 0.87        | 1.05         | 0.71        |
| <b>Other disease/disorder</b>                                                                                                                                                                                                                                                                | <b>80</b>  | <b>994</b>  | <b>188</b>  | <b>4955</b> | <b>2.12</b> | <b>2.78</b>  | <b>1.62</b> |
| <b>Other-Benign Prostatic Hypertrophy</b>                                                                                                                                                                                                                                                    | <b>157</b> | <b>917</b>  | <b>957</b>  | <b>4186</b> | <b>0.75</b> | <b>0.90</b>  | <b>0.62</b> |
| <b>Pulm-Asthma</b>                                                                                                                                                                                                                                                                           | <b>172</b> | <b>902</b>  | <b>444</b>  | <b>4699</b> | <b>2.02</b> | <b>2.44</b>  | <b>1.67</b> |
| <b>Pulm-Chronic lung disease</b>                                                                                                                                                                                                                                                             | <b>154</b> | <b>920</b>  | <b>502</b>  | <b>4641</b> | <b>1.55</b> | <b>1.88</b>  | <b>1.27</b> |
| <b>Pulm-Sleep apnea</b>                                                                                                                                                                                                                                                                      | <b>373</b> | <b>701</b>  | <b>1427</b> | <b>3716</b> | <b>1.39</b> | <b>1.59</b>  | <b>1.21</b> |
| Renal-Acute Kidney Disease                                                                                                                                                                                                                                                                   | 20         | 1054        | 63          | 5080        | 1.53        | 2.54         | 0.92        |
| <b>Renal-Kidney Disease no dialysis</b>                                                                                                                                                                                                                                                      | <b>76</b>  | <b>998</b>  | <b>262</b>  | <b>4881</b> | <b>1.42</b> | <b>1.85</b>  | <b>1.09</b> |
| <b>Renal-Kidney Disease with dialysis</b>                                                                                                                                                                                                                                                    | <b>21</b>  | <b>1053</b> | <b>61</b>   | <b>5082</b> | <b>1.66</b> | <b>2.74</b>  | <b>1.01</b> |
| Skin Condition                                                                                                                                                                                                                                                                               | 119        | 955         | 520         | 4623        | 1.11        | 1.37         | 0.90        |
| The number of participants endorsing each of the 75 potential conditions from the Baseline Survey and calculated odds ratio (OR) with upper and lower 95% confidence intervals (U95%CI, L95CI). Bolded values are significantly different between SCA cases and controls at an alpha of 0.05 |            |             |             |             |             |              |             |

**Table S3b. Self-Reported Medical History in Males with 47,XXY Compared to Matched 46,XY Controls**

|                                         | 47,XXY     |            | Controls    |             | OR          | U95%CI      | L95%CI      |
|-----------------------------------------|------------|------------|-------------|-------------|-------------|-------------|-------------|
|                                         | with       | w/o        | with        | w/o         |             |             |             |
| Circ-Congestive Heart Failure           | 40         | 534        | 167         | 2591        | 1.16        | 1.66        | 0.81        |
| <b>Circ-Coronary Artery Disease</b>     | <b>58</b>  | <b>516</b> | <b>423</b>  | <b>2335</b> | <b>0.62</b> | <b>0.83</b> | <b>0.46</b> |
| Circ-High Cholesterol                   | 276        | 298        | 1308        | 1450        | 1.03        | 1.23        | 0.86        |
| <b>Circ-Hypertension</b>                | <b>291</b> | <b>283</b> | <b>1716</b> | <b>1042</b> | <b>0.62</b> | <b>0.75</b> | <b>0.52</b> |
| Circ-Myocardial Infarction              | 61         | 513        | 333         | 2425        | 0.87        | 1.16        | 0.65        |
| <b>Circ-Other Circ System Problem</b>   | <b>82</b>  | <b>492</b> | <b>234</b>  | <b>2524</b> | <b>1.80</b> | <b>2.35</b> | <b>1.37</b> |
| <b>Circ-PE or DVT</b>                   | <b>68</b>  | <b>506</b> | <b>92</b>   | <b>2666</b> | <b>3.89</b> | <b>5.40</b> | <b>2.81</b> |
| <b>Circ-Peripheral Vascular Disease</b> | <b>43</b>  | <b>531</b> | <b>120</b>  | <b>2638</b> | <b>1.78</b> | <b>2.55</b> | <b>1.24</b> |
| <b>Circ-Stroke</b>                      | <b>52</b>  | <b>522</b> | <b>151</b>  | <b>2607</b> | <b>1.72</b> | <b>2.39</b> | <b>1.24</b> |
| Circ-Transient Ischemic Attack          | 31         | 543        | 106         | 2652        | 1.43        | 2.15        | 0.95        |
| <b>Endo-Diabetes</b>                    | <b>206</b> | <b>368</b> | <b>753</b>  | <b>2005</b> | <b>1.49</b> | <b>1.80</b> | <b>1.23</b> |
| Endo-Thyroid problem                    | 49         | 525        | 237         | 2521        | 0.99        | 1.37        | 0.72        |
| <b>GI-Acid Reflux/GERD</b>              | <b>232</b> | <b>342</b> | <b>947</b>  | <b>1985</b> | <b>1.42</b> | <b>1.71</b> | <b>1.18</b> |
| GI-Bowel obstruction                    | 9          | 565        | 25          | 2733        | 1.74        | 3.75        | 0.81        |
| GI-Celiac disease                       | 1          | 573        | 5           | 2753        | 0.96        | 8.24        | 0.11        |
| <b>GI-Colon Polyps</b>                  | <b>91</b>  | <b>483</b> | <b>649</b>  | <b>2109</b> | <b>0.61</b> | <b>0.78</b> | <b>0.48</b> |
| GI-Crohn's Disease                      | 6          | 568        | 11          | 2747        | 2.64        | 7.16        | 0.97        |
| <b>GI-Irritable Bowel Syndrome</b>      | <b>40</b>  | <b>534</b> | <b>97</b>   | <b>2661</b> | <b>2.05</b> | <b>3.00</b> | <b>1.41</b> |
| GI-Liver condition (eg cirrhosis)       | 20         | 554        | 100         | 2658        | 0.96        | 1.56        | 0.59        |
| GI-Other                                | 39         | 535        | 141         | 2617        | 1.35        | 1.95        | 0.94        |
| GI-Peptic Ulcers                        | 19         | 555        | 97          | 2661        | 0.94        | 1.55        | 0.57        |
| GI-Ulcerative colitis                   | 7          | 567        | 33          | 2725        | 1.02        | 2.32        | 0.45        |
| <b>HEENT-Blindness-any cause</b>        | <b>22</b>  | <b>552</b> | <b>49</b>   | <b>2709</b> | <b>2.20</b> | <b>3.67</b> | <b>1.32</b> |
| <b>HEENT-Cataracts</b>                  | <b>164</b> | <b>410</b> | <b>630</b>  | <b>2128</b> | <b>1.35</b> | <b>1.65</b> | <b>1.10</b> |
| HEENT-Deafness (partial/severe)         | 158        | 416        | 844         | 1914        | 0.86        | 1.05        | 0.70        |
| <b>HEENT-Glaucoma</b>                   | <b>74</b>  | <b>500</b> | <b>168</b>  | <b>2590</b> | <b>2.28</b> | <b>3.05</b> | <b>1.71</b> |
| HEENT-Macular Degeneration              | 22         | 552        | 122         | 2636        | 0.86        | 1.37        | 0.54        |
| <b>HEENT-Tinnitus</b>                   | <b>180</b> | <b>394</b> | <b>1060</b> | <b>1698</b> | <b>0.73</b> | <b>0.89</b> | <b>0.60</b> |
| Infx-Hepatitis C                        | 25         | 549        | 156         | 2602        | 0.76        | 1.17        | 0.49        |
| Infx-HIV/AIDS                           | 5          | 569        | 28          | 2730        | 0.86        | 2.23        | 0.33        |
| Infx-Other                              | 22         | 552        | 66          | 2692        | 1.63        | 2.66        | 0.99        |
| Infx-Tuberculosis                       | 12         | 562        | 46          | 2712        | 1.26        | 2.39        | 0.66        |
| <b>MH-ADHD</b>                          | <b>21</b>  | <b>553</b> | <b>94</b>   | <b>2664</b> | <b>1.08</b> | <b>1.74</b> | <b>0.66</b> |
| <b>MH-Anxiety/Panic</b>                 | <b>131</b> | <b>443</b> | <b>429</b>  | <b>2329</b> | <b>1.61</b> | <b>2.00</b> | <b>1.29</b> |
| MH-Bipolar                              | 30         | 544        | 102         | 2656        | 1.44        | 2.18        | 0.95        |
| <b>MH-Depression</b>                    | <b>221</b> | <b>353</b> | <b>754</b>  | <b>2004</b> | <b>1.66</b> | <b>2.01</b> | <b>1.38</b> |
| <b>MH-Eating disorder</b>               | <b>29</b>  | <b>545</b> | <b>56</b>   | <b>2702</b> | <b>2.57</b> | <b>4.06</b> | <b>1.62</b> |
| <b>MH-Other</b>                         | <b>43</b>  | <b>531</b> | <b>114</b>  | <b>2644</b> | <b>1.88</b> | <b>2.70</b> | <b>1.31</b> |



|                                           |            |            |            |             |             |              |             |
|-------------------------------------------|------------|------------|------------|-------------|-------------|--------------|-------------|
| <b>MH-Personality disorder</b>            | <b>29</b>  | <b>545</b> | <b>79</b>  | <b>2679</b> | <b>1.80</b> | <b>2.79</b>  | <b>1.17</b> |
| <b>MH-PTSD</b>                            | <b>148</b> | <b>426</b> | <b>533</b> | <b>2225</b> | <b>1.45</b> | <b>1.79</b>  | <b>1.18</b> |
| <b>MH-Schizophrenia</b>                   | <b>18</b>  | <b>556</b> | <b>37</b>  | <b>2721</b> | <b>2.38</b> | <b>4.21</b>  | <b>1.35</b> |
| MH-Social Phobia                          | 17         | 557        | 91         | 2667        | 0.89        | 1.51         | 0.53        |
| <b>MSK-Gout</b>                           | <b>43</b>  | <b>531</b> | <b>293</b> | <b>2465</b> | <b>0.68</b> | <b>0.95</b>  | <b>0.49</b> |
| <b>MSK-Osteoarthritis</b>                 | <b>181</b> | <b>393</b> | <b>611</b> | <b>2147</b> | <b>1.62</b> | <b>1.97</b>  | <b>1.33</b> |
| <b>MSK-Osteoporosis</b>                   | <b>43</b>  | <b>531</b> | <b>80</b>  | <b>2678</b> | <b>2.71</b> | <b>3.97</b>  | <b>1.85</b> |
| <b>MSK-Other arthritis</b>                | <b>181</b> | <b>393</b> | <b>611</b> | <b>2147</b> | <b>1.62</b> | <b>1.97</b>  | <b>1.33</b> |
| MSK-Other MSK problem                     | 126        | 448        | 584        | 2174        | 1.05        | 1.30         | 0.84        |
| <b>MSK-Rheumatoid arthritis</b>           | <b>66</b>  | <b>508</b> | <b>224</b> | <b>2534</b> | <b>1.47</b> | <b>1.97</b>  | <b>1.10</b> |
| Neuro-ALS                                 | 0          | 574        | 2          | 2756        |             |              |             |
| Neuro-Dementia                            | 10         | 564        | 27         | 2731        | 1.79        | 3.73         | 0.86        |
| <b>Neuro-Epilepsy</b>                     | <b>29</b>  | <b>545</b> | <b>61</b>  | <b>2697</b> | <b>2.35</b> | <b>3.70</b>  | <b>1.50</b> |
| <b>Neuro-Loss of consciousness</b>        | <b>84</b>  | <b>490</b> | <b>254</b> | <b>2504</b> | <b>1.69</b> | <b>2.20</b>  | <b>1.30</b> |
| <b>Neuro-Memory loss/impairment</b>       | <b>106</b> | <b>468</b> | <b>304</b> | <b>2454</b> | <b>1.83</b> | <b>2.33</b>  | <b>1.44</b> |
| <b>Neuro-Migraines</b>                    | <b>115</b> | <b>459</b> | <b>240</b> | <b>2518</b> | <b>2.63</b> | <b>3.35</b>  | <b>2.06</b> |
| Neuro-MS                                  | 2          | 572        | 15         | 2743        | 0.64        | 2.80         | 0.15        |
| <b>Neuro-Other</b>                        | <b>64</b>  | <b>510</b> | <b>188</b> | <b>2570</b> | <b>1.72</b> | <b>2.31</b>  | <b>1.27</b> |
| <b>Neuro-Other Headaches</b>              | <b>112</b> | <b>462</b> | <b>284</b> | <b>2474</b> | <b>2.11</b> | <b>2.69</b>  | <b>1.66</b> |
| Neuro-Parkinson's disease                 | 11         | 563        | 33         | 2725        | 1.61        | 3.21         | 0.81        |
| Neuro-Spinal Cord Injury                  | 50         | 524        | 205        | 2553        | 1.19        | 1.64         | 0.86        |
| Neuro-Traumatic Brain Injury              | 27         | 547        | 108        | 2650        | 1.21        | 1.86         | 0.79        |
| <b>Onc-Breast cancer</b>                  | <b>6</b>   | <b>568</b> | <b>3</b>   | <b>2755</b> | <b>9.70</b> | <b>38.90</b> | <b>2.42</b> |
| Onc-Colorectal cancer                     | 8          | 566        | 46         | 2712        | 0.83        | 1.78         | 0.39        |
| Onc-Lung cancer                           | 7          | 567        | 32         | 2726        | 1.05        | 2.39         | 0.46        |
| Onc-other cancer                          | 40         | 534        | 193        | 2565        | 1.00        | 1.42         | 0.70        |
| <b>Onc-Prostate cancer</b>                | <b>16</b>  | <b>558</b> | <b>196</b> | <b>2562</b> | <b>0.37</b> | <b>0.63</b>  | <b>0.22</b> |
| Onc-Skin cancer                           | 69         | 505        | 386        | 2372        | 0.84        | 1.10         | 0.64        |
| <b>Other disease/disorder</b>             | <b>53</b>  | <b>521</b> | <b>96</b>  | <b>2662</b> | <b>2.82</b> | <b>4.00</b>  | <b>1.99</b> |
| <b>Other-Benign Prostatic Hypertrophy</b> | <b>69</b>  | <b>505</b> | <b>528</b> | <b>2230</b> | <b>0.58</b> | <b>0.76</b>  | <b>0.44</b> |
| <b>Pulm-Asthma</b>                        | <b>94</b>  | <b>480</b> | <b>227</b> | <b>2531</b> | <b>2.18</b> | <b>2.83</b>  | <b>1.68</b> |
| <b>Pulm-Chronic lung disease</b>          | <b>68</b>  | <b>506</b> | <b>213</b> | <b>2545</b> | <b>1.61</b> | <b>2.14</b>  | <b>1.20</b> |
| <b>Pulm-Sleep apnea</b>                   | <b>199</b> | <b>375</b> | <b>763</b> | <b>1995</b> | <b>1.39</b> | <b>1.68</b>  | <b>1.15</b> |
| Renal-Acute Kidney Disease                | 8          | 566        | 36         | 2722        | 1.07        | 2.31         | 0.49        |
| Renal-Kidney Disease no dialysis          | 41         | 533        | 141        | 2617        | 1.43        | 2.05         | 1.00        |
| Renal-Kidney Disease with dialysis        | 9          | 565        | 32         | 2726        | 1.36        | 2.86         | 0.64        |
| Skin Condition                            | 60         | 514        | 277        | 2481        | 1.05        | 1.40         | 0.78        |

The number of participants endorsing each of the 75 potential conditions from the Baseline Survey and calculated odds ratio (OR) with upper and lower 95% confidence intervals (U95%CI, L95CI). Bolded values are significantly different between SCA cases and controls at an alpha of 0.05

| Table S3c. Self-Reported Medical History in Males with 47,XYY Compared to Matched 46,XY Controls |            |            |            |             |             |             |             |
|--------------------------------------------------------------------------------------------------|------------|------------|------------|-------------|-------------|-------------|-------------|
|                                                                                                  | 47,XYY     |            | Controls   |             | OR          | U95%CI      | L95%CI      |
|                                                                                                  | with       | w/o        | with       | w/o         |             |             |             |
| Circ-Congestive Heart Failure                                                                    | 29         | 471        | 136        | 2249        | 1.02        | 1.54        | 0.67        |
| <b>Circ-Coronary Artery Disease</b>                                                              | <b>56</b>  | <b>444</b> | <b>356</b> | <b>2029</b> | <b>0.72</b> | <b>0.97</b> | <b>0.53</b> |
| Circ-High Cholesterol                                                                            | 279        | 221        | 1296       | 1089        | 1.06        | 1.29        | 0.87        |
| Circ-Hypertension                                                                                | 293        | 207        | 1448       | 937         | 0.92        | 1.11        | 0.75        |
| Circ-Myocardial Infarction                                                                       | 50         | 450        | 279        | 2106        | 0.84        | 1.15        | 0.61        |
| <b>Circ-Other Circ System Problem</b>                                                            | <b>83</b>  | <b>417</b> | <b>193</b> | <b>2192</b> | <b>2.26</b> | <b>2.98</b> | <b>1.71</b> |
| <b>Circ-PE or DVT</b>                                                                            | <b>55</b>  | <b>445</b> | <b>85</b>  | <b>2300</b> | <b>3.34</b> | <b>4.77</b> | <b>2.35</b> |
| <b>Circ-Peripheral Vascular Disease</b>                                                          | <b>38</b>  | <b>462</b> | <b>108</b> | <b>2277</b> | <b>1.73</b> | <b>2.54</b> | <b>1.18</b> |
| <b>Circ-Stroke</b>                                                                               | <b>43</b>  | <b>457</b> | <b>131</b> | <b>2254</b> | <b>1.62</b> | <b>2.32</b> | <b>1.13</b> |
| Circ-Transient Ischemic Attack                                                                   | 24         | 476        | 85         | 2300        | 1.36        | 2.17        | 0.86        |
| <b>Endo-Diabetes</b>                                                                             | <b>195</b> | <b>305</b> | <b>650</b> | <b>1735</b> | <b>1.71</b> | <b>2.09</b> | <b>1.40</b> |
| Endo-Thyroid problem                                                                             | 39         | 461        | 197        | 2188        | 0.94        | 1.34        | 0.66        |
| GI-Acid Reflux/GERD                                                                              | 169        | 331        | 817        | 1568        | 0.98        | 1.20        | 0.80        |
| <b>GI-Bowel obstruction</b>                                                                      | <b>20</b>  | <b>480</b> | <b>51</b>  | <b>2334</b> | <b>1.91</b> | <b>3.23</b> | <b>1.13</b> |
| GI-Celiac disease                                                                                | 2          | 498        | 5          | 2380        | 1.91        | 9.88        | 0.37        |
| <b>GI-Colon Polyps</b>                                                                           | <b>87</b>  | <b>413</b> | <b>563</b> | <b>1822</b> | <b>0.68</b> | <b>0.88</b> | <b>0.53</b> |
| GI-Crohn's Disease                                                                               | 1          | 499        | 15         | 2370        | 0.32        | 2.40        | 0.04        |
| GI-Irritable Bowel Syndrome                                                                      | 5          | 495        | 42         | 2343        | 0.56        | 1.43        | 0.22        |
| GI-Liver condition (eg cirrhosis)                                                                | 21         | 479        | 90         | 2295        | 1.12        | 1.82        | 0.69        |
| GI-Other                                                                                         | 28         | 472        | 122        | 2263        | 1.10        | 1.68        | 0.72        |
| <b>GI-Peptic Ulcers</b>                                                                          | <b>31</b>  | <b>469</b> | <b>91</b>  | <b>2294</b> | <b>1.67</b> | <b>2.53</b> | <b>1.10</b> |
| GI-Ulcerative colitis                                                                            | 6          | 494        | 28         | 2357        | 1.02        | 2.48        | 0.42        |
| <b>HEENT-Blindness-any cause</b>                                                                 | <b>16</b>  | <b>484</b> | <b>42</b>  | <b>2343</b> | <b>1.84</b> | <b>3.31</b> | <b>1.03</b> |
| HEENT-Cataracts                                                                                  | 128        | 372        | 547        | 1838        | 1.16        | 1.44        | 0.93        |
| <b>HEENT-Deafness (partial/severe)</b>                                                           | <b>182</b> | <b>318</b> | <b>712</b> | <b>1673</b> | <b>1.34</b> | <b>1.65</b> | <b>1.10</b> |
| <b>HEENT-Glaucoma</b>                                                                            | <b>80</b>  | <b>420</b> | <b>144</b> | <b>2241</b> | <b>2.96</b> | <b>3.97</b> | <b>2.21</b> |
| HEENT-Macular Degeneration                                                                       | 28         | 472        | 111        | 2274        | 1.22        | 1.86        | 0.79        |
| <b>HEENT-Tinnitus</b>                                                                            | <b>163</b> | <b>337</b> | <b>905</b> | <b>1480</b> | <b>0.79</b> | <b>0.97</b> | <b>0.64</b> |
| Infx-Hepatitis C                                                                                 | 27         | 473        | 128        | 2257        | 1.01        | 1.54        | 0.66        |
| Infx-HIV/AIDS                                                                                    | 7          | 493        | 26         | 2359        | 1.29        | 2.98        | 0.56        |
| Infx-Other                                                                                       | 15         | 485        | 58         | 2327        | 1.24        | 2.21        | 0.70        |
| Infx-Tuberculosis                                                                                | 10         | 490        | 44         | 2341        | 1.09        | 2.17        | 0.54        |
| <b>MH-ADHD</b>                                                                                   | <b>34</b>  | <b>466</b> | <b>88</b>  | <b>2297</b> | <b>1.90</b> | <b>2.86</b> | <b>1.27</b> |
| MH-Anxiety/Panic                                                                                 | 86         | 414        | 406        | 1979        | 1.01        | 1.31        | 0.78        |
| MH-Bipolar                                                                                       | 26         | 474        | 93         | 2292        | 1.35        | 2.11        | 0.87        |
| MH-Depression                                                                                    | 153        | 347        | 704        | 1681        | 1.05        | 1.30        | 0.85        |
| <b>MH-Eating disorder</b>                                                                        | <b>26</b>  | <b>474</b> | <b>54</b>  | <b>2331</b> | <b>2.37</b> | <b>3.82</b> | <b>1.47</b> |
| <b>MH-Other</b>                                                                                  | <b>37</b>  | <b>463</b> | <b>100</b> | <b>2285</b> | <b>1.83</b> | <b>2.70</b> | <b>1.24</b> |
| <b>MH-Personality disorder</b>                                                                   | <b>27</b>  | <b>473</b> | <b>68</b>  | <b>2317</b> | <b>1.95</b> | <b>3.07</b> | <b>1.23</b> |

|                                                                                                                                                                                                                                                                                              |            |            |            |             |             |             |             |
|----------------------------------------------------------------------------------------------------------------------------------------------------------------------------------------------------------------------------------------------------------------------------------------------|------------|------------|------------|-------------|-------------|-------------|-------------|
| MH-PTSD                                                                                                                                                                                                                                                                                      | 46         | 454        | 279        | 2106        | 0.76        | 1.06        | 0.55        |
| <b>MH-Schizophrenia</b>                                                                                                                                                                                                                                                                      | <b>16</b>  | <b>484</b> | <b>38</b>  | <b>2347</b> | <b>2.04</b> | <b>3.69</b> | <b>1.13</b> |
| MH-Social Phobia                                                                                                                                                                                                                                                                             | 16         | 484        | 84         | 2301        | 0.91        | 1.56        | 0.53        |
| <b>MSK-Gout</b>                                                                                                                                                                                                                                                                              | <b>39</b>  | <b>461</b> | <b>351</b> | <b>2134</b> | <b>0.51</b> | <b>0.73</b> | <b>0.36</b> |
| MSK-Osteoarthritis                                                                                                                                                                                                                                                                           | 59         | 441        | 357        | 2028        | 0.76        | 1.02        | 0.57        |
| MSK-Osteoporosis                                                                                                                                                                                                                                                                             | 14         | 486        | 74         | 2311        | 0.90        | 1.61        | 0.50        |
| MSK-Other arthritis                                                                                                                                                                                                                                                                          | 125        | 375        | 542        | 1843        | 1.13        | 1.42        | 0.91        |
| MSK-Other MSK problem                                                                                                                                                                                                                                                                        | 91         | 409        | 530        | 1855        | 0.78        | 1.00        | 0.61        |
| MSK-Rheumatoid arthritis                                                                                                                                                                                                                                                                     | 41         | 459        | 190        | 2195        | 1.03        | 1.47        | 0.73        |
| Neuro-ALS                                                                                                                                                                                                                                                                                    | 2          | 498        | 1          | 2384        | 9.57        | 105.80      | 0.87        |
| Neuro-Dementia                                                                                                                                                                                                                                                                               | 6          | 494        | 23         | 2362        | 1.25        | 3.08        | 0.51        |
| Neuro-Epilepsy                                                                                                                                                                                                                                                                               | 18         | 482        | 54         | 2331        | 1.61        | 2.77        | 0.94        |
| <b>Neuro-Loss of consciousness</b>                                                                                                                                                                                                                                                           | <b>65</b>  | <b>435</b> | <b>231</b> | <b>2154</b> | <b>1.39</b> | <b>1.87</b> | <b>1.04</b> |
| Neuro-Memory loss/impairment                                                                                                                                                                                                                                                                 | 62         | 438        | 267        | 2118        | 1.12        | 1.51        | 0.84        |
| <b>Neuro-Migraines</b>                                                                                                                                                                                                                                                                       | <b>68</b>  | <b>432</b> | <b>221</b> | <b>2164</b> | <b>1.54</b> | <b>2.06</b> | <b>1.15</b> |
| Neuro-MS                                                                                                                                                                                                                                                                                     | 2          | 498        | 12         | 2373        | 0.79        | 3.56        | 0.18        |
| <b>Neuro-Other</b>                                                                                                                                                                                                                                                                           | <b>54</b>  | <b>446</b> | <b>164</b> | <b>2221</b> | <b>1.64</b> | <b>2.27</b> | <b>1.19</b> |
| <b>Neuro-Other Headaches</b>                                                                                                                                                                                                                                                                 | <b>87</b>  | <b>413</b> | <b>256</b> | <b>2129</b> | <b>1.75</b> | <b>2.28</b> | <b>1.34</b> |
| Neuro-Parkinson's disease                                                                                                                                                                                                                                                                    | 10         | 490        | 27         | 2358        | 1.78        | 3.71        | 0.86        |
| Neuro-Spinal Cord Injury                                                                                                                                                                                                                                                                     | 45         | 455        | 184        | 2201        | 1.18        | 1.66        | 0.84        |
| Neuro-Traumatic Brain Injury                                                                                                                                                                                                                                                                 | 21         | 479        | 91         | 2294        | 1.11        | 1.79        | 0.68        |
| Onc-Breast cancer                                                                                                                                                                                                                                                                            | 0          | 500        | 2          | 2383        |             |             |             |
| Onc-Colorectal cancer                                                                                                                                                                                                                                                                        | 8          | 492        | 40         | 2345        | 0.95        | 2.05        | 0.44        |
| Onc-Lung cancer                                                                                                                                                                                                                                                                              | 9          | 491        | 29         | 2356        | 1.49        | 3.17        | 0.70        |
| Onc-other cancer                                                                                                                                                                                                                                                                             | 34         | 466        | 173        | 2212        | 0.93        | 1.37        | 0.64        |
| Onc-Prostate cancer                                                                                                                                                                                                                                                                          | 26         | 474        | 151        | 2234        | 0.81        | 1.24        | 0.53        |
| Onc-Skin cancer                                                                                                                                                                                                                                                                              | 68         | 432        | 356        | 2029        | 0.90        | 1.19        | 0.68        |
| Other disease/disorder                                                                                                                                                                                                                                                                       | 27         | 473        | 92         | 2293        | 1.42        | 2.21        | 0.92        |
| Other-Benign Prostatic Hypertrophy                                                                                                                                                                                                                                                           | 88         | 412        | 429        | 1956        | 0.97        | 1.25        | 0.76        |
| <b>Pulm-Asthma</b>                                                                                                                                                                                                                                                                           | <b>78</b>  | <b>422</b> | <b>217</b> | <b>2168</b> | <b>1.85</b> | <b>2.44</b> | <b>1.40</b> |
| <b>Pulm-Chronic lung disease</b>                                                                                                                                                                                                                                                             | <b>86</b>  | <b>414</b> | <b>289</b> | <b>2096</b> | <b>1.51</b> | <b>1.96</b> | <b>1.16</b> |
| <b>Pulm-Sleep apnea</b>                                                                                                                                                                                                                                                                      | <b>174</b> | <b>326</b> | <b>664</b> | <b>1721</b> | <b>1.38</b> | <b>1.70</b> | <b>1.13</b> |
| <b>Renal-Acute Kidney Disease</b>                                                                                                                                                                                                                                                            | <b>12</b>  | <b>488</b> | <b>27</b>  | <b>2358</b> | <b>2.15</b> | <b>4.27</b> | <b>1.08</b> |
| Renal-Kidney Disease no dialysis                                                                                                                                                                                                                                                             | 35         | 465        | 121        | 2264        | 1.41        | 2.08        | 0.95        |
| <b>Renal-Kidney Disease with dialysis</b>                                                                                                                                                                                                                                                    | <b>12</b>  | <b>488</b> | <b>29</b>  | <b>2356</b> | <b>2.00</b> | <b>3.94</b> | <b>1.01</b> |
| Skin Condition                                                                                                                                                                                                                                                                               | 59         | 441        | 243        | 2142        | 1.18        | 1.60        | 0.87        |
| The number of participants endorsing each of the 75 potential conditions from the Baseline Survey and calculated odds ratio (OR) with upper and lower 95% confidence intervals (U95%CI, L95CI). Bolded values are significantly different between SCA cases and controls at an alpha of 0.05 |            |            |            |             |             |             |             |
