# Supplementary material for: Prevalence, Morbidity, and Mortality of Men With Sex Chromosome Aneuploidy in the Million Veteran Program Cohort
Source: PubMed Central journal article supplement (PMC10980972; doi:10.1001/jamanetworkopen.2024.4113), 2024-03-29
Supplement: jamanetwopen-e244113-s002.pdf [file jamanetwopen-e244113-s002.pdf]

## Data Sharing Statement

Davis. Prevalence, Morbidity, and Mortality of Men with Sex Chromosome Aneuploidy in the Million Veteran Program Cohort. *JAMA Netw Open*. Published March 29, 2024.

doi:10.1001/jamanetworkopen.2024.4113

### Data

**Data available:** Yes

**Data types:** Deidentified participant data, Data (not involving human participants), Data dictionary

**How to access data:** Patient-level data are already accessible to all VA researchers with appropriate IRB approvals.

**When available:** With publication

### Supporting Documents

**Document types:** None

### Additional Information

**Who can access the data:** Patient-level data are currently accessible to all VA researchers with appropriate IRB approvals.

**Types of analyses:** Data is available for any type of analysis.

**Mechanisms of data availability:** Data will be made available after IRB approvals.
